# Supplementary material for: Identification and Characterization of Arbutus Unedo L. Endophytic Bacteria Isolated From Wild and Cultivated Trees for the Biological Control of Phytophthora
Source: Preprints.org preprint supplement (doi:10.20944/preprints202107.0130.v1), 2021-07-06
Supplement: Supplementary file 3 [file supplementary]

## Sheet: Sheet1
Supplementary Table 1. Isolation conditions and identification of A. unedo bacteria isolates.
Code	Sample	Replicate	Medium	pH	Dilution	Temperature	RAPD Profile	Identification
Au01	Orchard	3	ABM2	7.0	SM	20	1	Pseudomonas avellanae
Au02	Wild	4	ABM2	7.0	SM	20	2	Bacillus toyonensis
Au03	Wild	5	ABM2	7.0	10-2	20	3	Paenibacillus humicus
Au04	Wild	5	ABM2	7.0	10-2	20	4	Bacillus megaterium
Au05	Wild	5	ABM2	7.0	10-2	20	5	Bacillus toyonensis
Au06	Orchard	2	ABM2	7.0	10-2	20	6	Bacillus cereus
Au07	Orchard	1	ABM2	7.0	10-1	20	6	Bacillus cereus
Au08	Orchard	1	ABM2	7.0	10-1	20	7	Bacillus toyonensis
Au09	Wild	6	ABM2	7.0	10-1	20	8	Paenibacillus humicus
Au10	Orchard	3	ABM2	7.0	10-1	20	1	Pseudomonas avellanae
Au11	Orchard	3	ABM2	7.0	10-1	20	9	Pseudomonas avellanae
Au12	Wild	4	ABM2	7.0	10-3	25	10	Bacillus toyonensis
Au13	Orchard	2	ABM2	8.5	10-1	20	12	Bacillus safensis subsp. safensis
Au14	Wild	4	ABM2	8.5	10-3	25	13	Paenibacillus pabuli
Au15	Wild	5	869	5.5	10-2	20	14	Paenibacillus humicus
Au16	Orchard	3	869	7.0	SM	20	1	Pseudomonas avellanae
Au17	Orchard	3	869	7.0	10-1	20	1	Pseudomonas avellanae
Au19	Wild	5	869	7.0	SM	20	16	Paenibacillus humicus
Au20	Wild	5	869	7.0	SM	20	17	Bacillus simplex
Au21	Orchard	2	869	7.0	SM	20	18	Paenibacillus humicus
Au22	Orchard	2	869	7.0	SM	20	19	Bacillus toyonensis
Au24	Orchard	1	869	7.0	SM	20	20	Paenibacillus taichungensis
Au25	Wild	5	869	7.0	10-1	20	22	Paenibacillus humicus
Au26	Wild	6	869	7.0	10-2	20	16	Paenibacillus humicus
Au27	Orchard	2	869	7.0	SM	25	23	Paenibacillus pabuli
Au28	Orchard	2	869	7.0	SM	25	24	Paenibacillus taichungensis
Au29	Wild	5	869	7.0	10-2	25	14	Paenibacillus humicus
Au30	Wild	5	869	7.0	10-2	25	25	Paenibacillus pabuli
Au31	Wild	5	869	7.0	10-2	25	26	Paenibacillus marchantiophytorum
Au34	Wild	5	869	7.0	10-2	25	27	Paenibacillus humicus
Au35	Wild	5	869	7.0	10-2	25	28	Paenibacillus humicus
Au36	Orchard	3	869	8.5	10-2	20	8	Paenibacillus humicus
Au37	Wild	5	869	8.5	10-3	20	30	Bacillus cereus
Au38	Wild	5	869	8.5	SM	20	31	Bacillus cereus
Au39	Wild	6	869	8.5	10-3	25	32	Pseudomonas poae
Au40	Orchard	1	869	8.5	SM	25	20	Paenibacillus taichungensis
Au42	Wild	3	869	5.5	SM	25	34	Sphingomonas panni
Au43	Wild	6	ABM2	8.5	10-2	25	36	Paenibacillus taichungensis
Au44	Orchard	1	ABM2	8.5	SM	25	37	Bacillus cereus
Au46	Wild	5	ABM2	8.5	10-2	25	38	Paenibacillus etheri
Au48	Wild	4	ABM2	8.5	SM	25	39	Paenibacillus humicus
Au49	Orchard	1	ABM2	7.0	SM	25	20	Paenibacillus taichungensis
Au50	Orchard	1	ABM2	7.0	SM	25	40	Paenibacillus taichungensis
Au51	Orchard	3	ABM2	7.0	10-2	25	37	Bacillus cereus
Au52	Orchard	2	ABM2	7.0	SM	25	42	Paenibacillus taichungensis
Au53	Orchard	2	ABM2	7.0	SM	25	5	Bacillus toyonensis
Au55	Orchard	1	869	8.5	SM	30	43	Paenibacillus taichungensis
Au56	Orchard	1	869	5.5	SM	30	45	Staphylococcus capitis subp. capitis
Au60	Orchard	3	ABM2	8.5	SM	30	46	Paenibacillus pabuli
Au61	Wild	4	ABM2	8.5	SM	30	48	Bacillus taxi
Au63	Orchard	1	ABM2	8.5	SM	30	49	Staphylococcus epidermidis
Au64	Wild	6	869	7.0	SM	30	51	Bacillus taxi
Au66	Orchard	3	869	7.0	SM	30	53	Sphingomonas panni
Au68	Wild	5	869	7.0	10-2	30	55	Paenibacillus humicus
Au70	Wild	5	869	7.0	10-2	30	56	Paenibacillus etheri
Au71	Wild	5	869	7.0	10-2	30	8	Paenibacillus humicus
Au72	Wild	5	ABM2	7.0	10-1	30	57	Bacillus cereus
Au73	Wild	6	ABM2	7.0	SM	30	58	Staphylococcus epidermidis
Au74	Wild	4	ABM2	7.0	SM	30	59	Paenibacillus pabuli
Au75	Orchard	3	ABM2	7.0	SM	25	60	Bacillus cereus
Au76	Wild	5	869	7.0	10-2	25	61	Paenibacillus marchantiophytorum
Au77	Orchard	2	ABM2	7.0	10-2	30	62	Paenibacillus humicus
